# Supplementary material
Source: PubMed Central journal article supplement (PMC2214705)
Supplement: JCI0833813sd.pdf [file JCI0833813sd.pdf]

## Supplementary Figure 1

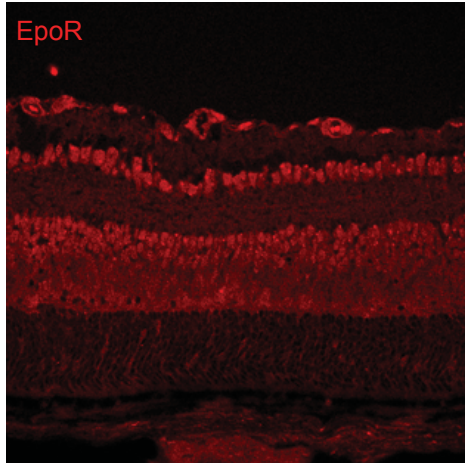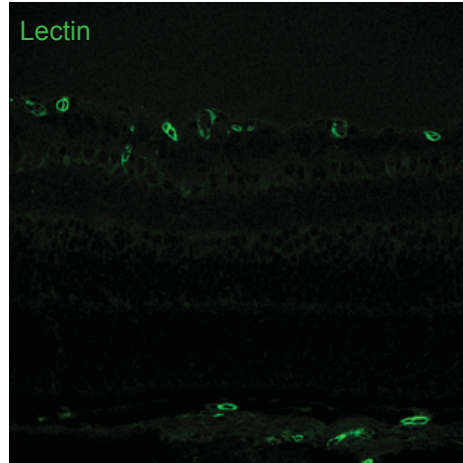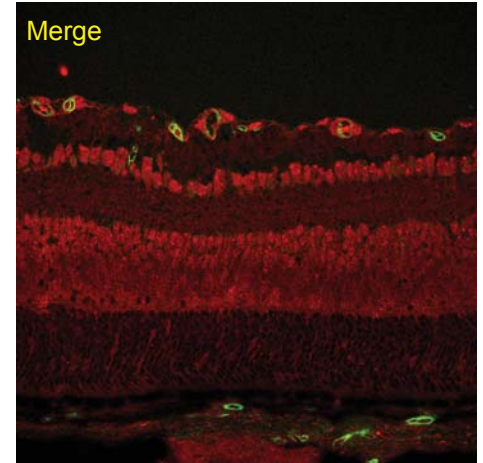

**Supplementary Figure 1** Localization of Epo receptor with immunohistochemistry. Representative retinal cross sections from P8 normoxia mouse immunolabeled with Epo receptor antibody (red), and lectin (green).
